# Supplementary material for: The expression, significance and function of cancer susceptibility candidate 9 in lung squamous cell carcinoma: A bioinformatics and in vitro investigation
Source: PubMed Central journal article supplement — Int J Oncol. 2019 Mar 19;54(5):1651–64. doi: 10.3892/ijo.2019.4758 (PMC6439977; doi:10.3892/ijo.2019.4758), 2019-03-19
Supplement: IJO-54-05-1651-supp.pdf [file IJO-54-05-1651-supp.pdf]

Figure S1. Kaplan-Meier survival curves of the prognostic value of CASC9 for patients with lung squamous cell carcinoma from The Cancer Genome Atlas. The patients were divided into low- (blue) and high-expression groups (green) according to the median CASC9 expression levels. CASC9, cancer susceptibility candidate 9. Low-expression examined and high-expression examined indicate censored data in the low- and high-expression groups.

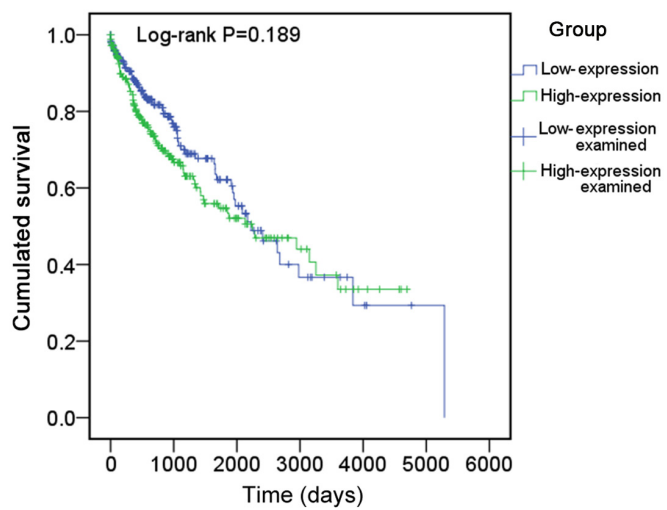

Figure S2. CASC9 siRNA knockdown efficiency. The downregulation of CASC9 RNA was determined by reverse transcription-quantitative polymerase chain reaction following the transfection of siRNA. The plot displays the CASC9 mRNA expression in the form of  $2^{-\Delta Cq}$  for the blank control, cells with scrambled siRNA pool and cells with CASC9 siRNA pool at 0, 48, 72 and 96 h after transfection. CASC9, cancer susceptibility candidate 9; siRNA, small interfering RNA. \*\* $P < 0.01$  and \*\*\* $P < 0.001$ .

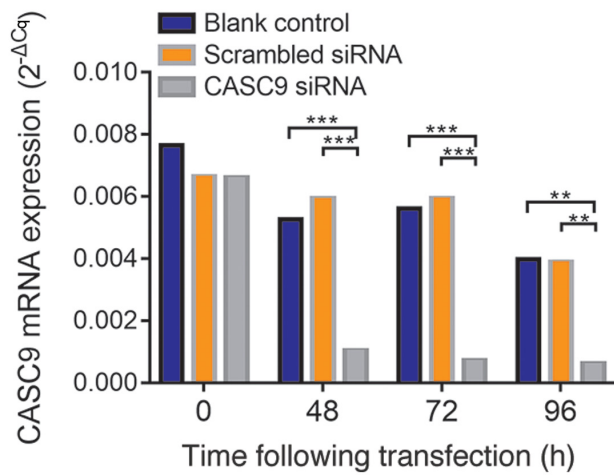

Table SI. Sequences of the selected siRNAs used in the present study.

| siRNA                 | Sequence (5'-3')    |
|-----------------------|---------------------|
| si-CASC9 #1           | GTCTTCACATTCCTTTAA  |
| si-CASC9 #2           | GACTTCAAATAGCTATTT  |
| si-CASC9 #3           | CCAGACAGCAGCAAAGCAA |
| si-CASC9 #4           | CCATTCTAAACATAAGTTA |
| Scrambled si-CASC9 #1 | GCTTTAACTCCTTTACTTA |
| Scrambled si-CASC9 #2 | GGTTTACATATATTCACAA |
| Scrambled si-CASC9 #3 | GCCGCAAACGACGAAACAA |
| Scrambled si-CASC9 #4 | GTTCAATACACCTAAATTA |

siRNA, small interfering RNA; CASC9, cancer susceptibility candidate 9.
